# Supplementary material for: Biochemical Analysis of Leukocytes after In Vitro and In Vivo Activation with Bacterial and Fungal Pathogens Using Raman Spectroscopy
Source: MDPI journal article supplement (doi:10.3390/ijms221910481), 2021-09-28
Supplement: s1 [file s1]

# Biochemical analysis of leukocytes after *in-vitro* and *in-vivo* activation with bacterial and fungal pathogens using Raman spectroscopy

Aikaterini Pistiki<sup>1,2</sup>, Anuradha Ramoji<sup>1,2,3</sup>, Oleg Ryabchykov<sup>1,3</sup>, Daniel Thomas-Rüddel<sup>2,4</sup>, Adrian T. Press<sup>2,4,8</sup>, Oliwia Makarewicz<sup>5</sup>, Evangelos J. Giamarellos-Bourboulis<sup>6</sup>, Michael Bauer<sup>2,4,7</sup>, Thomas Bocklitz<sup>1,3</sup>, Jürgen Popp<sup>1,2,3,7</sup>, Ute Neugebauer<sup>1,2,3,7\*</sup>

\*Equal contribution

<sup>1</sup>Leibniz Institute of Photonic Technology Jena (a member of Leibniz Health Technologies), Albert-Einstein-Str. 9, 07745 Jena, Germany

<sup>2</sup>Center for Sepsis Control and Care, Jena University Hospital, Am Klinikum 1, 07747 Jena, Germany

<sup>3</sup>Institute of Physical Chemistry and Abbe Center of Photonics, Friedrich Schiller University, Helmholtzweg 4, 07743 Jena, Germany

<sup>4</sup>Department of Anesthesiology and Intensive Care, Jena University Hospital, Am Klinikum 1, 07747 Jena, Germany

<sup>5</sup>Institute of Infectious Diseases and Infection Control, Jena University Hospital, Am Klinikum 1, 07747 Jena, Germany

<sup>6</sup>4<sup>th</sup> department of internal medicine, National and Kapodistrian University of Athens, Medical School, STREET?, Athens, Greece

<sup>7</sup>Jena Biophotonics and Imaging Laboratory, Albert-Einstein-Str. 9, 07745 Jena, Germany

<sup>8</sup>Medical Faculty, Friedrich Schiller University, Bachstr. 18, 07743 Jena, Germany

\*Corresponding author: ute.neugebauer@med.uni-jena.de, Phone: +49 3641 9390900

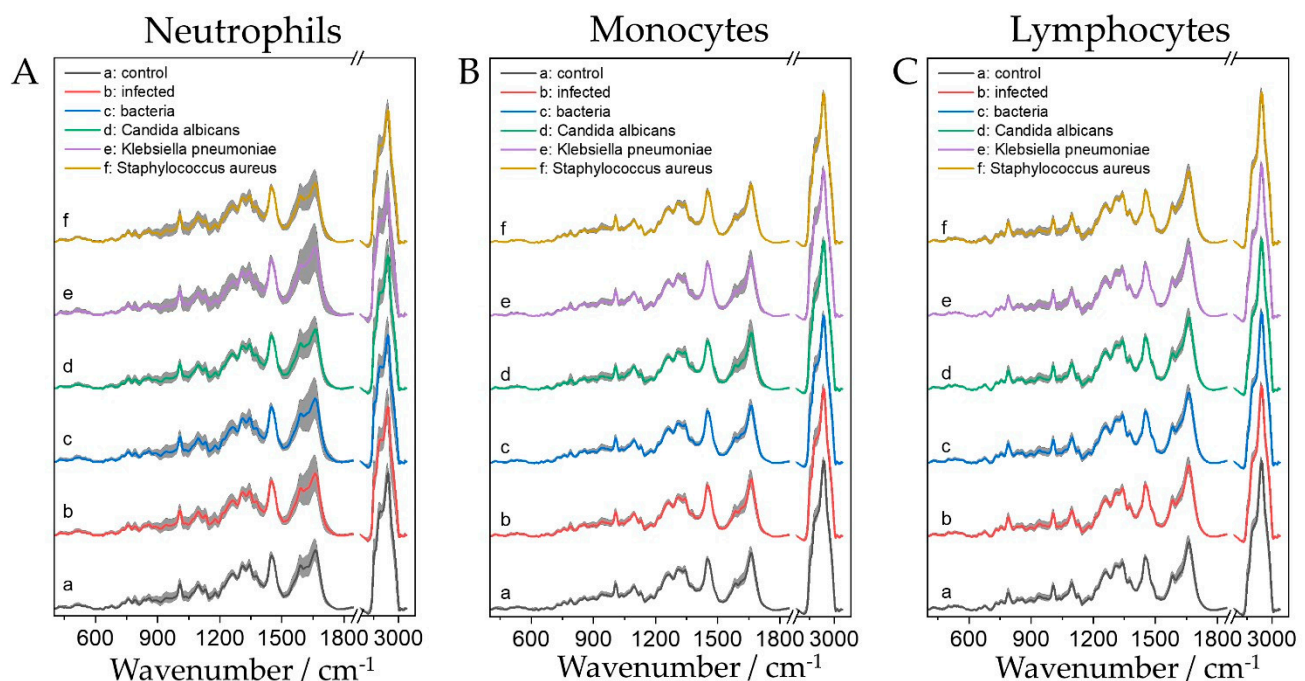

**Supplemental Figure S1.** Mean Raman spectra of A) neutrophils, B) monocytes, and C) lymphocytes. Mean spectra were computed from 6 donors (neutrophils) or 5 donors (monocytes and lymphocytes). The number of used cells can be calculated with the help of Table S5. Raman spectra are shifted along the y-axis for clarity. From bottom to top: a) non-infected, b) infected with pathogens, c) infected with bacteria, d) infected with fungi (*C. albicans*), e) infected with *K. pneumoniae*, f) infected with *S. aureus*.

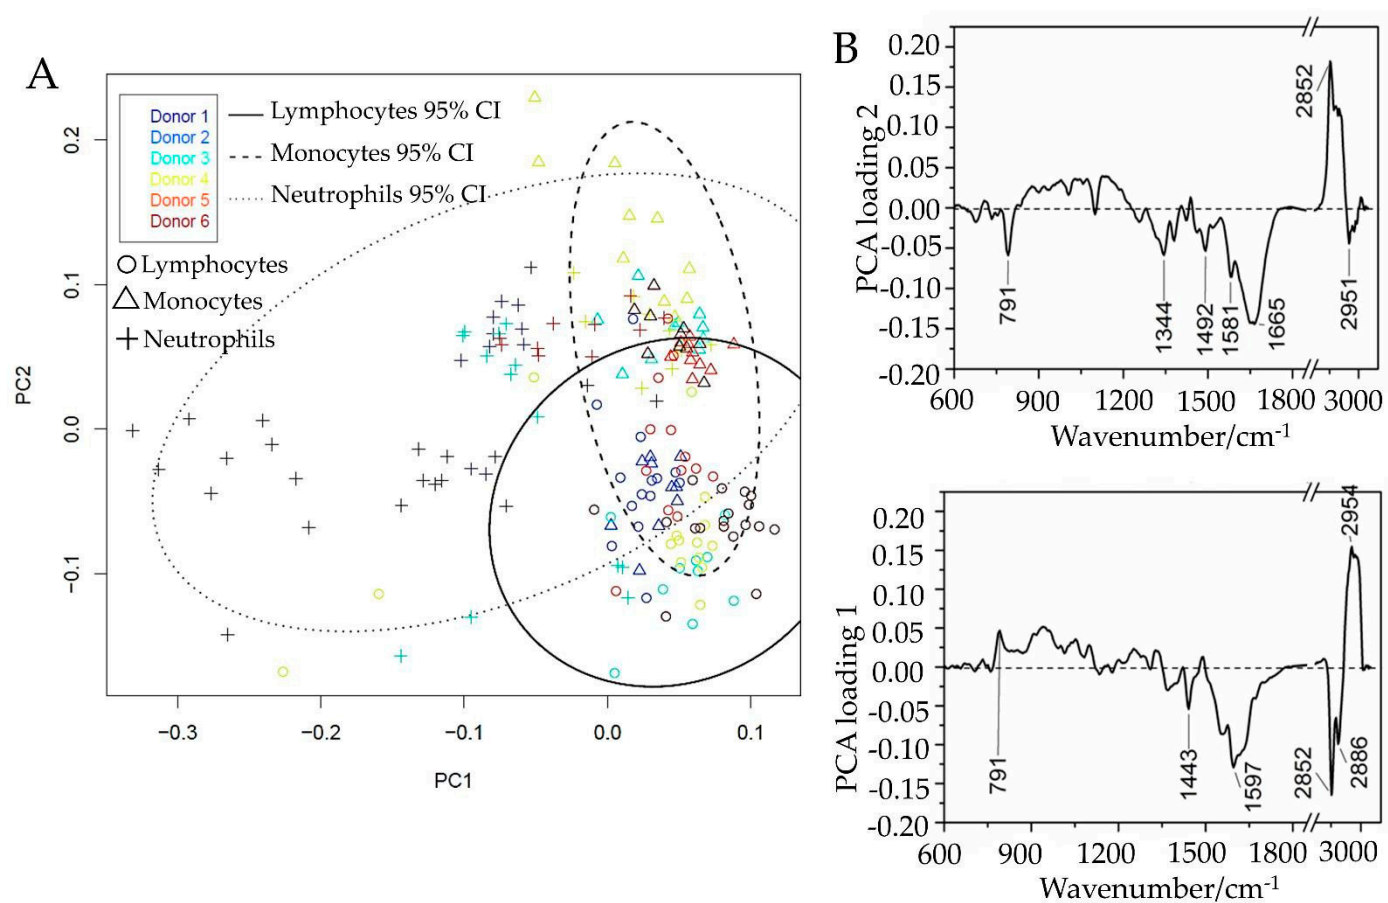

**Supplemental Figure S2.** Principal component analysis of non-activated leukocytes subpopulations using Raman spectra. (A) PCA score plot showing the distribution of leukocyte subpopulations (lymphocytes, monocytes, and 28 neutrophils) with the ellipses indicating 0.95 confidence interval for each cell population and (B) PC loadings 1 and 2 29 obtained from the PCA analysis show the contributing Raman bands.

## Healty donors

## Patients

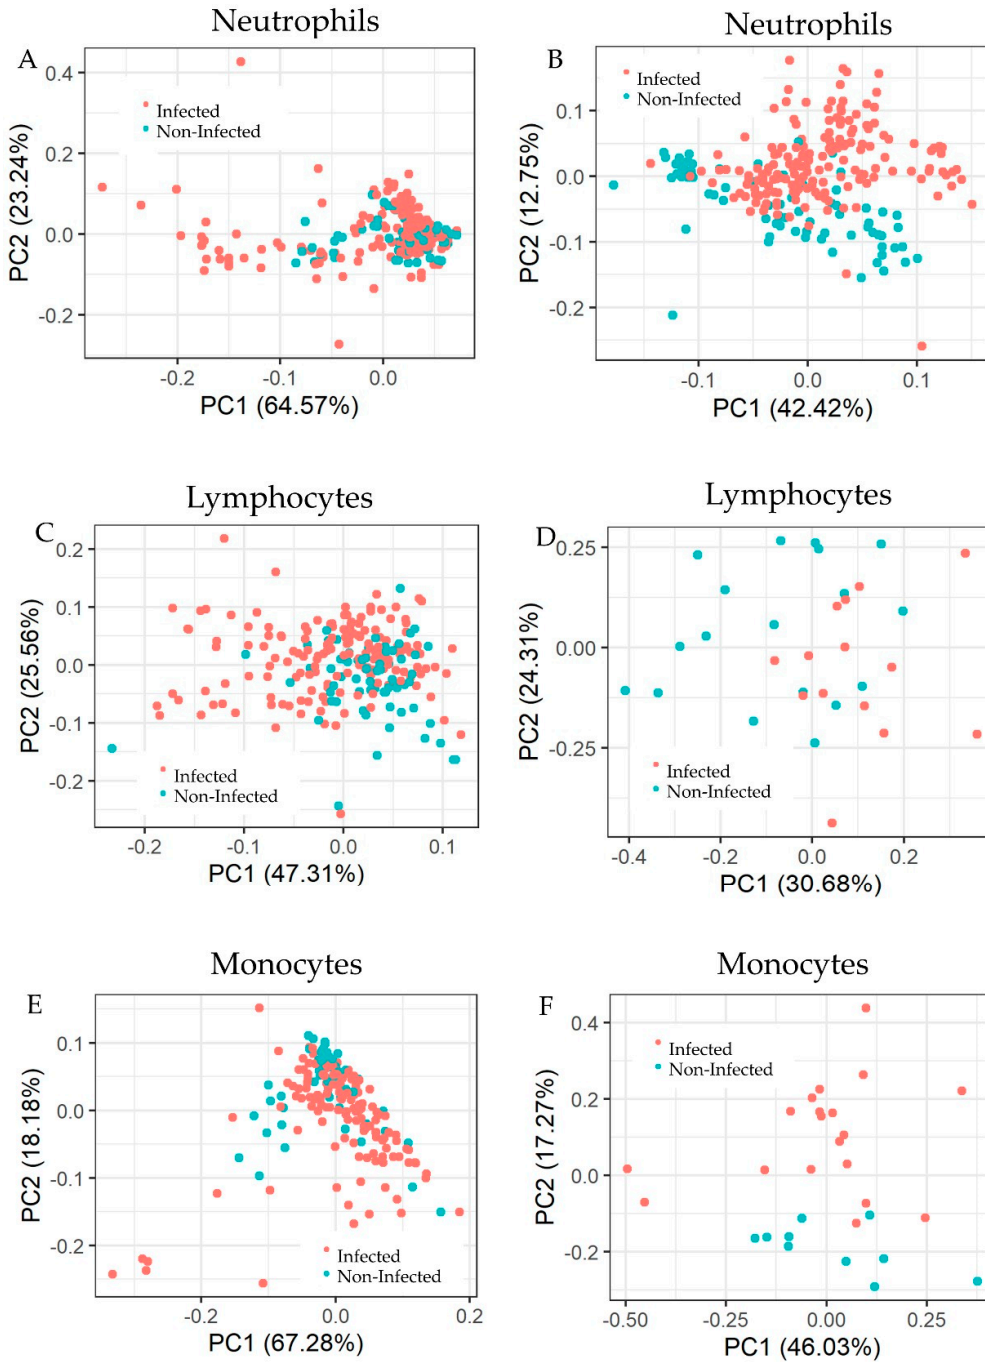

**Figure S3.** PCA score plots of Raman data to separate infected and non-infected cells. Score plots are shown for different leukocyte subpopulations obtained from healthy donor (left column) and patient (right column) samples. The colors represent infected (pink) and non-infected (cyan) cells. For neutrophils from donor samples, the range of PC scores for infected cells is larger than for the non-infected cells, which points to higher heterogeneity of the infected samples. The differentiation between the infected and non-infected cells is more prominent for patient samples. The separation between infected and non-infected cells appears among patient's lymphocytes visible already in the first PC.

## Healthy donors

## Patients

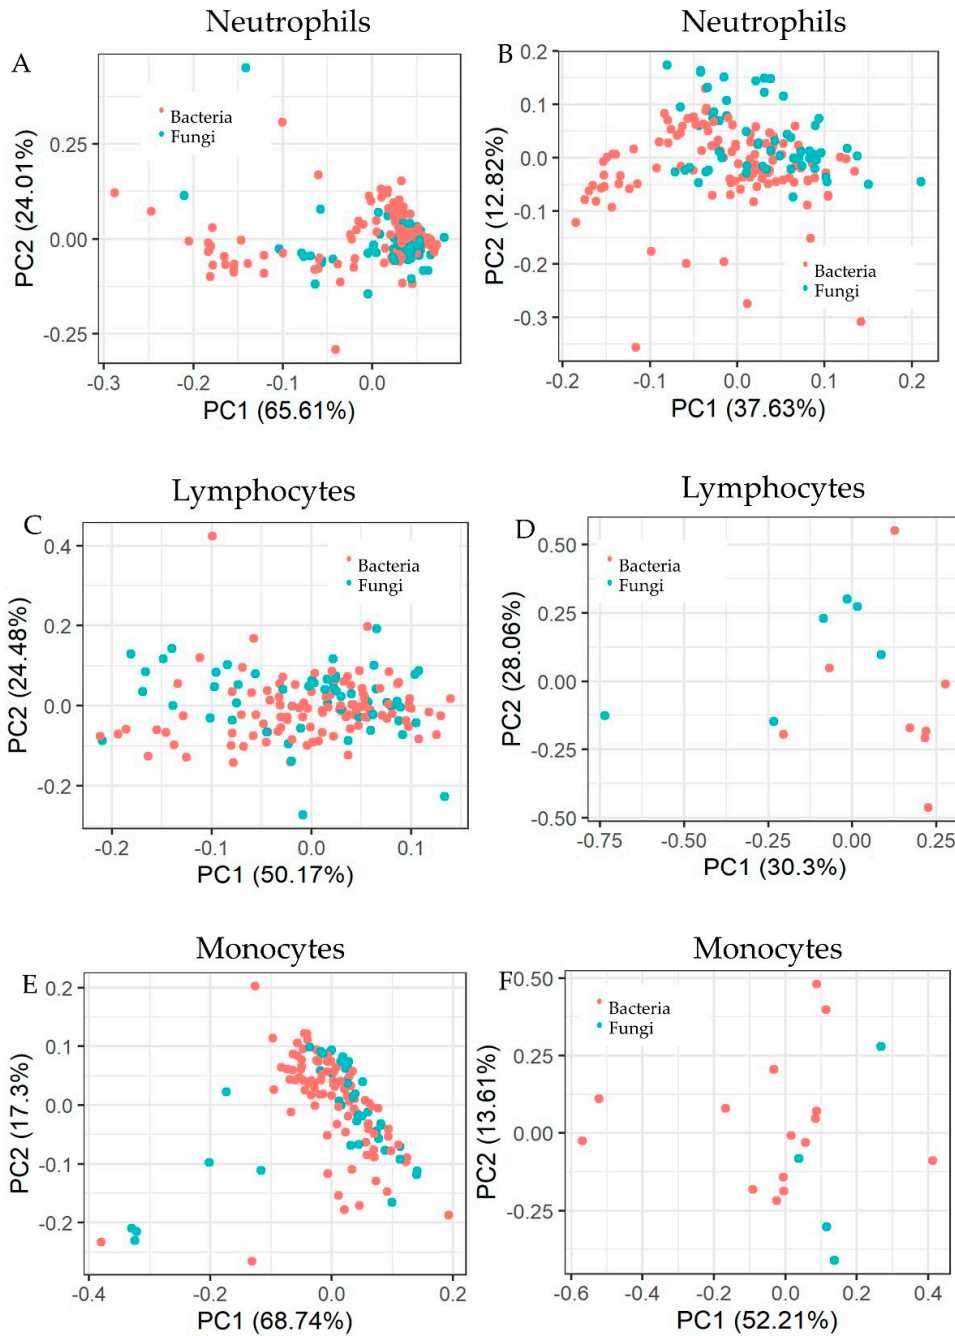

**Figure S4.** PCA score plots of Raman spectra of cells infected with bacteria and fungi. Score plots are shown for different leukocyte subpopulations obtained from healthy donor (left column) and patient (right column) samples. The colors represent cells infected with bacteria (pink) and fungi (cyan). The differences between neutrophils infected with different pathogens is more prominent in patient samples, which is similar to Figure S3. Due to the large difference in number of lymphocytes and monocytes obtained from donor and patient samples, the scatterplots for these two cell subpopulations cannot be reliably compared between each other.

## Healthy donors

## Patients

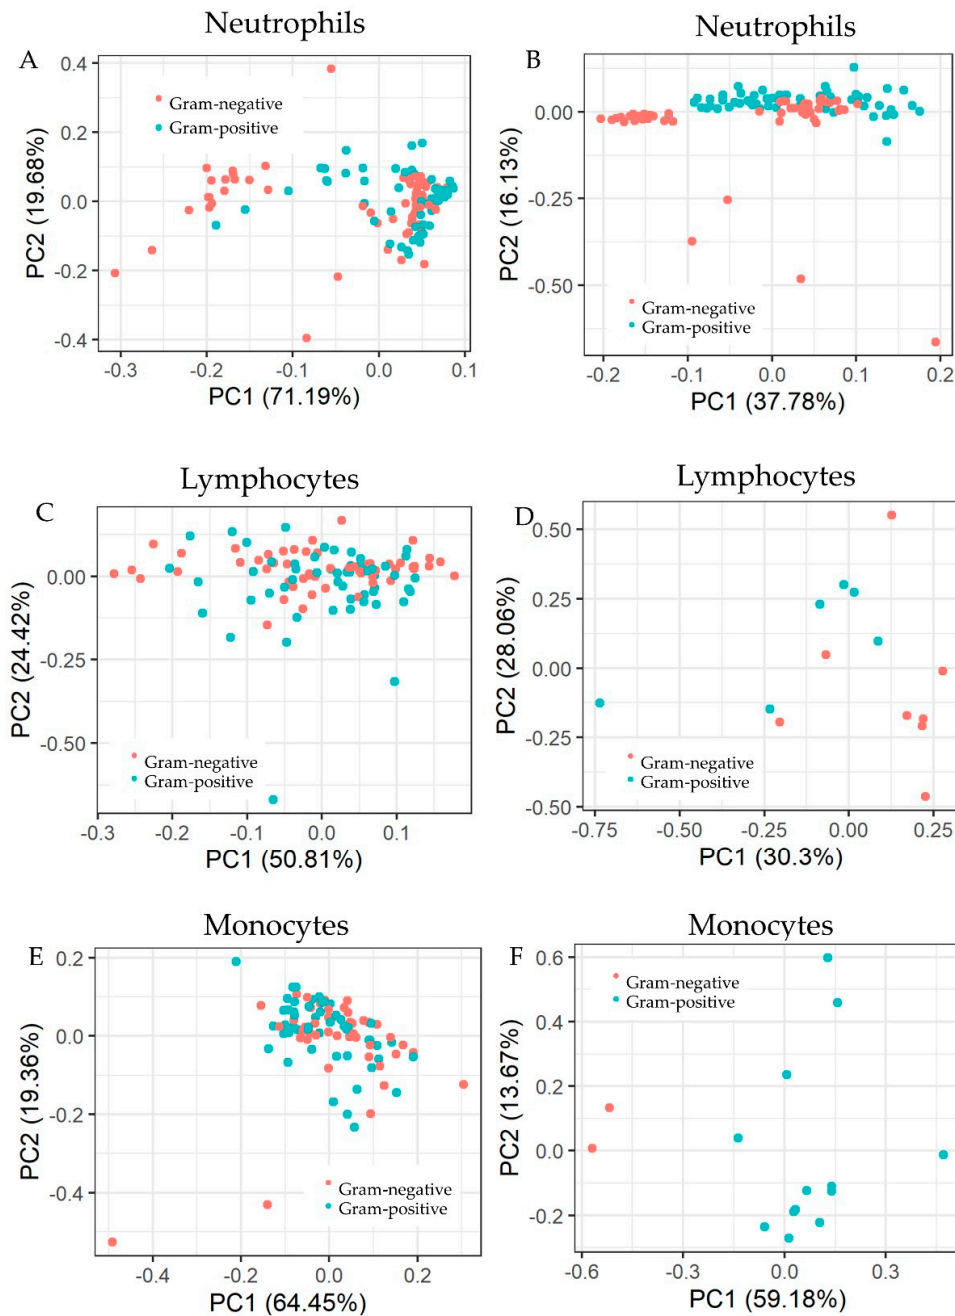

**Figure S5.** PCA score plots of Raman spectra of cells infected with bacteria. Score plots are shown for different leukocyte subpopulations obtained from donor (left column) and patient (right column) samples. The colors represent cells infected with gram-negative (pink) and gram-positive (cyan) bacteria. Both donor and patient samples infected with gram-negative bacteria show high heterogeneity for neutrophils along the first PC. Good separation of monocytes from the patient infected with gram-negative bacteria should be interpreted carefully, since only two monocytes from a single patient were analyzed in the gram-negative patient samples.



# Analysis

## Data Pre-processing

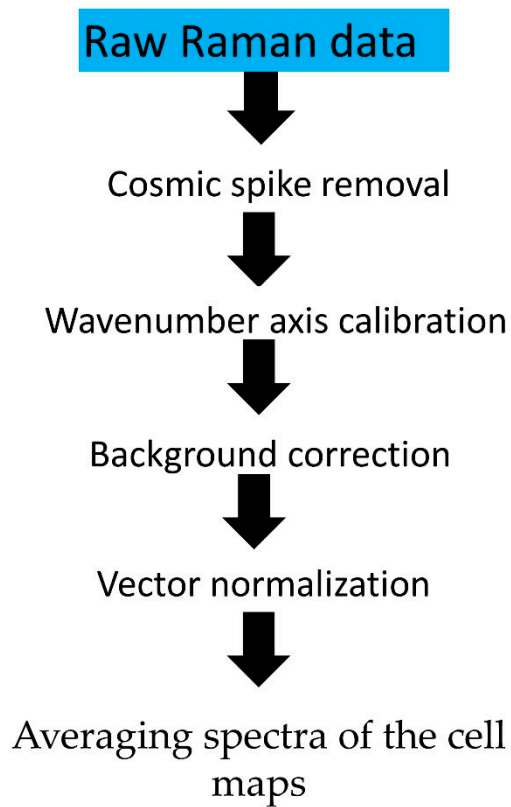

## Step by step decision tree

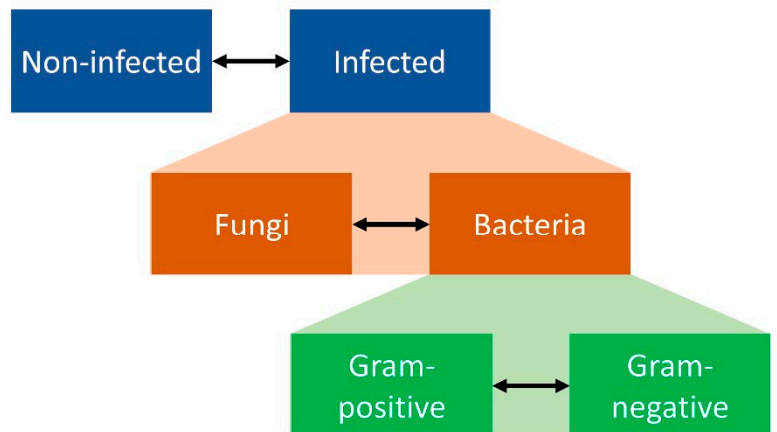

**Figure S6.** Schematics of the statistical analysis. **Left:** Data pre-processing work-flow. **Right:** Step-by-step decision tree to differentiate leukocytes (in different treatment groups or from different patients).

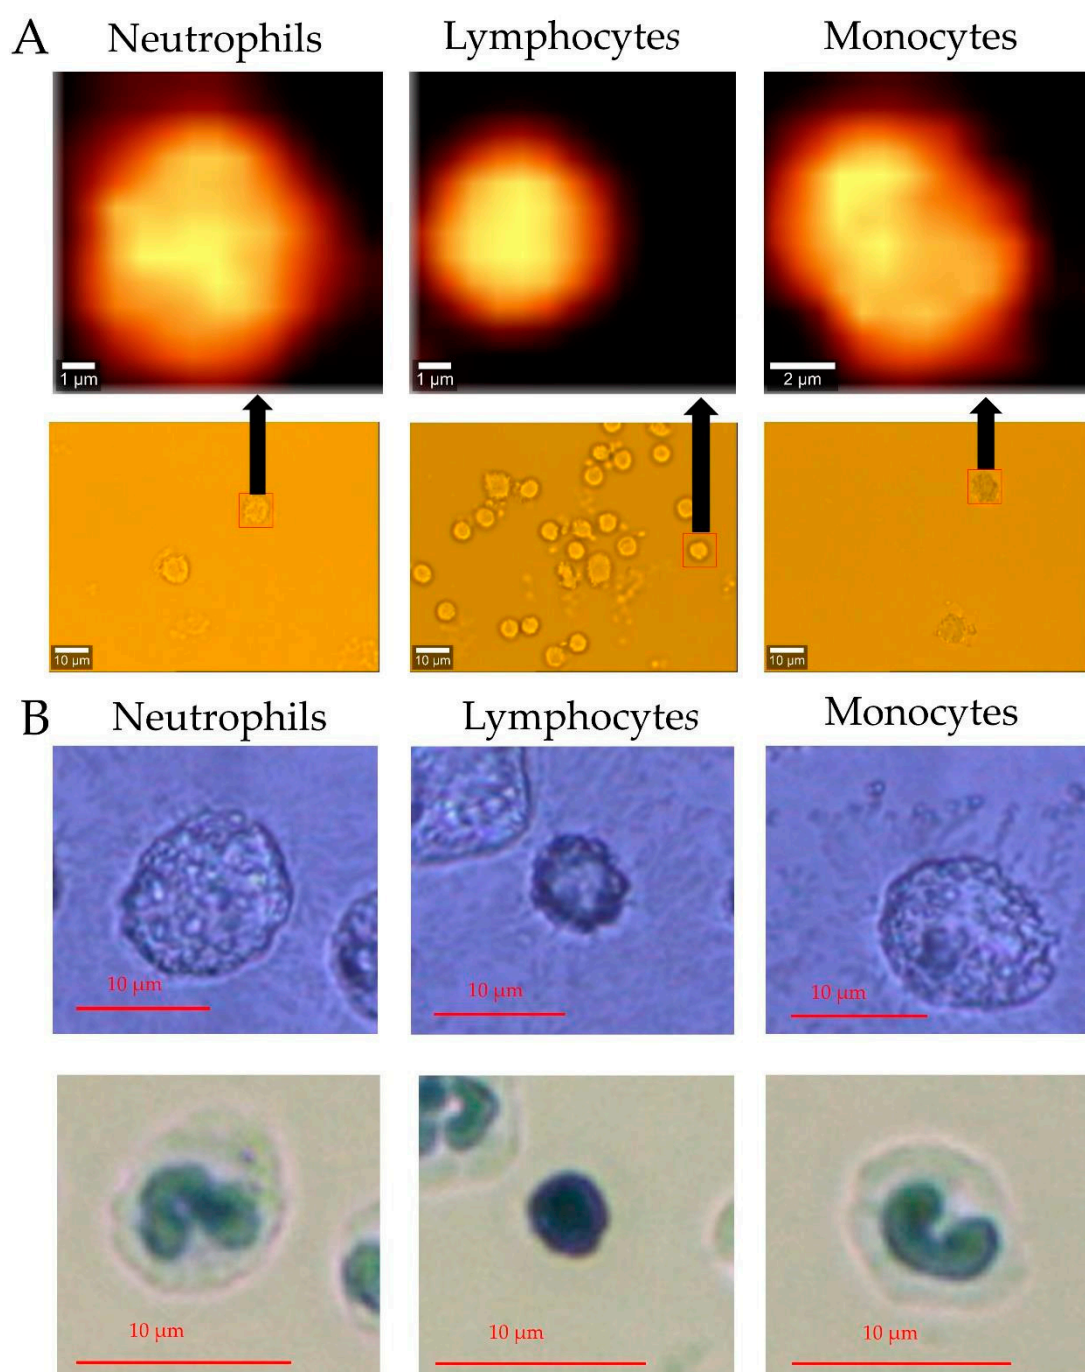

**Figure S7. A In-vitro model: Overview** white light images are depicted on the bottom. From those images, area scans were selected. Exemplarily, a false color Raman image representing overall Raman intensity of the CH-stretching band ( $2800\text{ cm}^{-1}$ -  $3000\text{ cm}^{-1}$ ) is shown for each subtype.

**B Leukocytes from patients:** In the top row white light images of leukocytes isolated from patients after spin-coating onto CaF<sub>2</sub> slides are shown. The cells were measured in dried condition to avoid detachment from the slide. After Raman measurements, leukocytes were stained using Kimura. The cells were relocated in the microscope and based on the nucleus shape the leukocytes sub-population were identified. Bottom row shows images of Kimura stained neutrophils, lymphocytes and monocytes from patients which are depicted in the top row.

**Table S1.** Interpretation of biochemical information from Raman spectra in non-infected and infected (*S. aureus*, *K. pneumoniae*, and *C. albicans*) lymphocytes and monocytes.

| <b>Neutrophils</b>  |                 |                     |                 |                                             |                                        |                   |
|---------------------|-----------------|---------------------|-----------------|---------------------------------------------|----------------------------------------|-------------------|
| <i>In-vitro</i>     |                 | <i>In-vivo</i>      |                 |                                             |                                        |                   |
| <i>Non-infected</i> | <i>Infected</i> | <i>Non-infected</i> | <i>Infected</i> | <i>Raman assignments</i>                    | <i>Biomolecule</i>                     | <i>References</i> |
| 1348                |                 |                     |                 | G(DNA/RNA)                                  | Nucleic acid                           | (1)               |
| 1381                |                 |                     |                 |                                             |                                        |                   |
|                     | 1438/43         |                     |                 | CH <sub>2</sub> CH <sub>3</sub> deformation | All proteins, carbohydrates and lipids | (2)               |
| 1589                |                 |                     |                 | Cytosine and Guanine of DNA                 | Nucleic acid                           | (3)               |
|                     | 1597            |                     |                 | Guanine/Adenine                             | Nucleic acid                           | (1)               |
|                     | 1633            |                     |                 | Amide I (β-sheet structure)                 | Proteins                               | (3)               |
|                     | 2849/52         |                     | 2846            | CH <sub>2</sub> symmetric stretch           | Lipids                                 | (4)               |
| 2944/47             |                 | 2948                |                 | CH stretching                               | Proteins                               | (4)               |
| <b>Lymphocytes</b>  |                 |                     |                 |                                             |                                        |                   |
| <i>In-vitro</i>     |                 | <i>In-vivo</i>      |                 |                                             |                                        |                   |
| <i>Non-infected</i> | <i>Infected</i> | <i>Non-infected</i> | <i>Infected</i> | <i>Raman assignments</i>                    | <i>Biomolecule</i>                     | <i>References</i> |
| 1074                |                 |                     |                 | PO <sub>2</sub> backbone C-N str            | Nucleic acid                           | (1, 5)            |
|                     |                 |                     | 754             | Thymine, Tryptophan                         | Nucleic acid                           | (1, 5)            |
|                     | 791             |                     |                 | Phosphate backbone vibrations               | Nucleic acid                           | (1, 5)            |
|                     | 1340/1344       |                     |                 | G(DNA/RNA)                                  | Nucleic acid                           | (1)               |
|                     | 1385            |                     |                 |                                             |                                        |                   |
| 1443                |                 | 1436                |                 | CH <sub>2</sub> CH <sub>3</sub> deformation | All proteins, carbohydrates and lipids | (2)               |
|                     | 1492            |                     |                 | C and G of DNA                              | Nucleic acid                           | (4)               |
|                     | 1581/1589       |                     |                 | Cytosine and Guanine of DNA                 | Nucleic acid                           | (1)               |
|                     |                 | 1600                |                 | Guanine/Adenine                             | Nucleic acid                           | (1)               |
|                     | 1649            |                     |                 | Amide I                                     | Proteins                               | (1, 5)            |
|                     | 1677/1681       |                     |                 | NADH and Amide I                            | Bound and free NADH, proteins          | (2, 6)            |
| 2856                |                 | 2854                |                 | CH <sub>2</sub> symmetric stretch           | Lipids                                 | (4)               |
| 2886                |                 |                     |                 | CH stretching                               | Lipids                                 | (4)               |
| 2897                |                 |                     |                 | CH stretching                               | Lipids                                 | (4)               |
|                     |                 |                     | 2914            | CH stretching                               | Protein, lipids                        | (7)               |
|                     | 2947/2951       |                     |                 | CH stretching                               | Proteins                               | (4)               |
|                     |                 | 2992                |                 | =CH asymmetric stretch                      | Lipids                                 |                   |
| <b>Monocytes</b>    |                 |                     |                 |                                             |                                        |                   |
| <i>In vitro</i>     |                 | <i>In-vivo</i>      |                 |                                             |                                        |                   |
| <i>Non-infected</i> | <i>Infected</i> | <i>Non-infected</i> | <i>Infected</i> | <i>Raman assignments</i>                    | <i>Biomolecule</i>                     | <i>References</i> |
| 791                 |                 |                     |                 | Phosphate backbone vibrations               | Nucleic acid                           | (1, 5)            |



|           |           |      |                                                |                                         |        |
|-----------|-----------|------|------------------------------------------------|-----------------------------------------|--------|
| 1005      |           |      | Phenylalanine                                  | Proteins                                | (1, 5) |
| 1100      |           |      | PO <sub>2</sub> backbone C-N str               | Nucleic acid                            | (1, 4) |
| 1235      |           |      | Amide III (coupled N-H/C-H deformations)       | Proteins(7)                             | (1)    |
| 1344/1340 |           |      | G(DNA/RNA)                                     | Nucleic acid                            | (1)    |
|           | 1443      |      | CH <sub>2</sub> CH <sub>3</sub> deformation    | carbohydrates and lipids                | (2)    |
|           | 1556      |      | C-C stretching Tryptophan                      | Proteins                                |        |
| 1589      |           |      | C and G of DNA                                 | Nucleic acid                            | (1)    |
|           | 1597      |      | Guanine/Adenine                                | Nucleic acid                            | (1, 5) |
|           | 1629      |      | Amide I (β-sheet structure)                    | Proteins                                |        |
|           | 2850/2852 | 2844 | CH <sub>2</sub> symmetric stretching of lipids | Lipids                                  | (4)    |
|           | 2893/2886 |      | CH stretching                                  | Lipids                                  | (4)    |
| 2947/2951 |           | 2948 | CH stretching                                  | Proteins                                | (4)    |
| 2988      |           |      | =CH asymmetric stretch                         | Lipids                                  | (4)    |
|           |           | 2974 | CH <sub>2</sub> symmetric stretch              | All proteins, carbohydrates, and lipids | (4)    |

**Table S2.** Interpretation of biochemical information from Raman spectra in neutrophils, monocytes, and lymphocytes infected by bacterial pathogens (*S. aureus*, *K. pneumoniae*) and fungi (*C. albicans*).

| <b>Neutrophils</b> |              |                 |              |                                             |                                         |                   |
|--------------------|--------------|-----------------|--------------|---------------------------------------------|-----------------------------------------|-------------------|
| <i>In-vitro</i>    |              | <i>In-vivo</i>  |              | <i>Raman assignments</i>                    | <i>Biomolecule</i>                      | <i>References</i> |
| <i>Bacteria</i>    | <i>Fungi</i> | <i>Bacteria</i> | <i>Fungi</i> |                                             |                                         |                   |
|                    | 698          |                 |              |                                             |                                         |                   |
|                    | 764          |                 |              | Trp                                         | proteins                                | (1, 5)            |
| 1010               |              |                 |              | Phenylalanine                               | Proteins                                | (1, 5)            |
| 1095               |              |                 |              | PO <sub>2</sub> backbone C-N str            | Nucleic acid                            | (1, 5)            |
| 1265               |              |                 |              | Amide III random coil                       | Proteins                                | (5)               |
| 1302               |              |                 |              | CH <sub>3</sub> CH <sub>2</sub> deformation | All protein, lipids, and carbohydrate s | (1)               |
| 1335               |              |                 |              | DNA, Tyr, Trp                               | Nucleic acid, Proteins                  | (8)               |
| 1451               |              | 1438            |              | CH <sub>2</sub> CH <sub>3</sub> deformation | All proteins, carbohydrates, and lipids | (2)               |
|                    | 1560         |                 |              | CC stretching Tryptophan                    | Proteins                                | (2)               |
|                    |              | 1578            |              | Guanine/Adenine                             | Nucleic acid                            | (1)               |
|                    | 1593         |                 |              | Guanine/Adenine                             | Nucleic acid                            | (1)               |
| 1625               |              |                 |              | Amide I (β-sheet structure)                 | Proteins                                | (3)               |
| 1669               |              |                 | 1662         | Amide I (α-helix structure)                 | Proteins                                | (1, 5)            |
| 2849/2856          |              | 2858            |              | CH <sub>2</sub> symmetric stretching        | Lipids                                  | (4)               |
|                    | 2934         |                 | 2930         | CH stretching                               | Proteins                                | (4)               |
|                    | 2951         |                 |              | CH <sub>3</sub> asymmetric stretching       | Proteins                                | (4)               |

| <b>Lymphocytes</b> |              |                 |              |                                             |                                         |                   |
|--------------------|--------------|-----------------|--------------|---------------------------------------------|-----------------------------------------|-------------------|
| <i>In-vitro</i>    |              | <i>In-vivo</i>  |              |                                             |                                         |                   |
| <i>Bacteria</i>    | <i>Fungi</i> | <i>Bacteria</i> | <i>Fungi</i> |                                             |                                         | <i>References</i> |
| 791                |              | 788             |              | Phosphate backbone vibrations               | Nucleic acid                            | (1, 5)            |
|                    |              |                 | 860          | Ribose ring vibration                       | Nucleic acid                            | (4)               |
|                    | 1010         |                 |              | Phenylalanine                               | Proteins                                | (1, 5)            |
|                    | 1104         |                 |              | PO <sub>2</sub> - in nucleic acids          | Nucleic acid                            | (1)               |
|                    |              | 1236            |              | Amide III coupled N-H/C-H deformations      | Proteins                                | (1, 4)            |
|                    | 1256         |                 |              | Amide III coupled N-H/C-H deformations      | Proteins                                | (1)               |
|                    |              | 1304            |              | CH <sub>3</sub> CH <sub>2</sub> deformation | All protein, lipids, and carbohydrates  | (1)               |
|                    | 1348         |                 |              | G (DNA/RNA)                                 | Nucleic acid                            | (1)               |
|                    |              | 1438            |              | CH <sub>2</sub> CH <sub>3</sub> deformation | All proteins, carbohydrates and lipids  | (2)               |
|                    | 1459/1451    |                 |              | CH <sub>2</sub> CH <sub>3</sub> deformation | All proteins, carbohydrates, and lipids | (5)               |
| 1496               |              |                 |              | C and G of DNA                              | Nucleic acid                            | (4)               |
|                    |              | 1580            |              | Cytosine and Guanine of DNA                 | Nucleic acid                            | (1)               |
|                    | 1613         |                 |              | Amino acids                                 | Proteins                                | (5)               |
|                    | 1621         |                 | 1622         | Amide I (β-sheet structure)                 | Proteins                                | (3)               |
|                    | 1661         |                 |              | Amide I (α-helix structure)                 | Proteins                                | (1, 5)            |
|                    | 1677         |                 |              | NADH and Amide I (beta-sheet)               | Bound and free NADH                     | (2, 6)            |
|                    |              |                 | 1744         | C=O ester stretching, non-saturated         | Lipids                                  | (9)               |
|                    |              | 2830            |              | CH <sub>2</sub> symmetric stretching        | Lipids                                  | (4)               |
| 2852               |              |                 |              | CH <sub>2</sub> symmetric stretching        | Lipids                                  | (4)               |
| 2876               |              |                 |              | CH <sub>3</sub> symmetric stretching        | Lipids                                  | (4)               |
|                    | 2883         |                 |              | CH stretching                               | Lipids                                  | (4)               |
|                    |              |                 | 2908         | CH stretching                               | lipids                                  | (4)               |
|                    | 2930         |                 |              | CH stretching                               | Proteins                                | (4)               |

| <b>Monocytes</b> |              |                 |              |                               |              |                   |
|------------------|--------------|-----------------|--------------|-------------------------------|--------------|-------------------|
| <i>In-vitro</i>  |              | <i>In-vivo</i>  |              |                               |              |                   |
| <i>Bacteria</i>  | <i>Fungi</i> | <i>Bacteria</i> | <i>Fungi</i> |                               |              | <i>References</i> |
|                  | 675          |                 |              | Guanine (DNA/RNA) C-C twist   | Nucleic acid | (4, 5)            |
|                  | 791          |                 |              | Phosphate backbone vibrations | Nucleic acid | (1, 5)            |

|           |      |      |                                             |                                         |        |
|-----------|------|------|---------------------------------------------|-----------------------------------------|--------|
| 953       |      |      | Backbone DNA                                | Nucleic acid                            | (2)    |
| 1014/1010 |      |      | Phenylalanine                               | Proteins                                | (1, 5) |
|           | 1100 |      | PO <sub>2</sub> backbone C-N str            | Nucleic acid                            | (1)    |
| 1248      |      |      | Amide III coupled N-H/C-H deformations      | Proteins                                | (1, 4) |
| 1310      |      | 1310 | CH <sub>3</sub> CH <sub>2</sub> deformation | Proteins, lipids, and carbohydrates     | (1)    |
|           | 1381 |      | Guanine, Adenine ring vibrations            | Nucleic acid                            | (10)   |
| 1455/1451 |      |      | CH <sub>2</sub> CH <sub>3</sub> deformation | All proteins, carbohydrates, and lipids | (2)    |
|           | 1492 |      | C and G of DNA                              | Nucleic acid                            | (4)    |
|           |      | 1548 | CC stretching Tryptophan                    | Proteins                                | (2)    |
| 1593      |      |      | Guanine/Adenine                             | Nucleic acid                            | (1)    |
| 1609      |      |      | Amino acids                                 | Protein                                 | (5)    |
| 1661      |      |      | Amide I ( $\alpha$ -helix structure)        | Proteins                                | (1, 5) |
| 1673      |      |      | NADH and Amide I                            | Protein                                 | (2, 6) |
| 2859      |      | 2842 | CH <sub>2</sub> symmetric stretching        | Lipids                                  | (4)    |
| 2886      |      |      | CH stretching                               | Lipids                                  | (4)    |
|           | 2940 | 2936 | CH stretching                               | Proteins                                | (4)    |
| 2998      |      |      | =CH asymmetric stretch                      | Lipids, fatty acids                     |        |

**Table S3.** Interpretation of biochemical information from Raman spectra in monocytes infected by *K. pneumoniae* and *S. aureus*.

| Neutrophils          |                  |                      |                  |                                             |                                         |                   |
|----------------------|------------------|----------------------|------------------|---------------------------------------------|-----------------------------------------|-------------------|
| <i>In-vitro</i>      |                  | <i>In-vivo</i>       |                  | <i>Raman assignments</i>                    | <i>Biomolecule</i>                      | <i>References</i> |
| <i>K. pneumoniae</i> | <i>S. aureus</i> | <i>K. pneumoniae</i> | <i>S. aureus</i> |                                             |                                         |                   |
|                      |                  | 1000                 |                  | Phenylalanine                               | Proteins                                | (1)               |
|                      |                  | 1312                 |                  | CH <sub>3</sub> CH <sub>2</sub> deformation | Proteins, lipids, and carbohydrates     | (1)               |
|                      | 1348             |                      |                  | G (DNA/RNA)                                 | Nucleic acid                            | (1)               |
|                      |                  | 1372                 |                  | G, A ring vibrations                        | Nucleic acid                            | (2)               |
| 1443                 | 1438             |                      |                  | CH <sub>2</sub> CH <sub>3</sub> deformation | All proteins, carbohydrates, and lipids | (2)               |
|                      |                  | 1554                 |                  | CC stretching Tryptophan                    | Proteins                                | (2)               |
| 1593                 |                  |                      |                  | Guanine/Adenine                             | Nucleic acid                            | (1)               |
| 1637/1641            |                  | 1648                 |                  | Amide I                                     | Proteins                                | (1)               |
| 2852                 |                  | 2842                 |                  | CH <sub>2</sub> symmetric stretching        | Lipids                                  | (4)               |
|                      | 2954             |                      |                  | CH <sub>3</sub> asymmetric stretching       | Proteins                                | (4)               |

### Lymphocytes

| <i>In-vitro</i>      |                  | <i>In-vivo</i>       |                  | <i>Raman assignments</i>                      | <i>Biomolecule</i>                      | <i>References</i> |
|----------------------|------------------|----------------------|------------------|-----------------------------------------------|-----------------------------------------|-------------------|
| <i>K. pneumoniae</i> | <i>S. aureus</i> | <i>K. pneumoniae</i> | <i>S. aureus</i> |                                               |                                         |                   |
|                      | 791              |                      |                  | Phosphate backbone vibrations                 | Nucleic acid                            | (1)               |
|                      |                  |                      | 860              | Ribose ring vibration                         | Nucleic acid                            | (4)               |
|                      | 1100             |                      |                  | PO <sub>2</sub> <sup>-</sup> in nucleic acids | Nucleic acid                            | (1)               |
|                      |                  | 1236                 |                  | Amide III coupled N-H/C-H deformations        | Proteins                                | (1, 4)            |
|                      |                  | 1304                 |                  | CH <sub>3</sub> CH <sub>2</sub> deformation   | All protein, lipids, and carbohydrates  | (1)               |
|                      | 1340/1348        |                      |                  | G (DNA/RNA)                                   | Nucleic acid                            | (1)               |
|                      | 1381             |                      |                  | Guanine, Adenine ring vibrations              | Nucleic acid                            |                   |
| 1438/1447            |                  | 1440                 |                  | CH <sub>2</sub> CH <sub>3</sub> deformation   | All proteins, carbohydrates, and lipids | (2)               |
|                      | 1487             |                      |                  | C and G of DNA                                | Nucleic acid                            | (4)               |
|                      | 1581             | 1580                 |                  | Cytosine and Guanine of DNA                   | Nucleic acid                            | (1)               |
|                      | 1677/1685        |                      |                  | NADH and Amide I (beta-sheet)                 | Bound and free NADH                     | (2, 6)            |
| 2840/2852            |                  |                      |                  | CH <sub>2</sub> symmetric stretching          | Lipids                                  | (4)               |
| 2883/2886            |                  |                      | 2886             | CH stretching                                 | Lipids                                  | (4)               |
|                      | 2951             |                      |                  | CH <sub>3</sub> asymmetric stretching         | Proteins                                | (4)               |

### Monocytes

| <i>In-vitro</i>      |                  | <i>In-vivo</i>       |                  | <i>Raman assignments</i>                    | <i>Biomolecule</i>                      | <i>References</i> |
|----------------------|------------------|----------------------|------------------|---------------------------------------------|-----------------------------------------|-------------------|
| <i>K. pneumoniae</i> | <i>S. aureus</i> | <i>K. pneumoniae</i> | <i>S. aureus</i> |                                             |                                         |                   |
| 791                  |                  |                      |                  | Phosphate backbone vibrations               | Nucleic acid                            | (1, 5)            |
|                      | 1010             | 998                  |                  | Phenylalanine                               | Proteins                                | (1, 5)            |
| 1104/1100            |                  |                      |                  | PO <sub>2</sub> in nucleic acids            | Nucleic acid                            | (1)               |
| 1306                 |                  |                      |                  | CH <sub>3</sub> CH <sub>2</sub> deformation | All protein, lipids, and carbohydrates  | (1)               |
| 1340                 |                  |                      |                  | Guanine (DNA/RNA)                           | Nucleic acid                            | (1)               |
|                      |                  | 1370                 |                  | Guanine, Adenine ring vibrations            | Nucleic acid                            |                   |
| 1381                 |                  |                      |                  |                                             |                                         |                   |
|                      | 1406             |                      |                  |                                             |                                         |                   |
| 1447                 |                  |                      |                  | CH <sub>2</sub> CH <sub>3</sub> deformation | All proteins, carbohydrates, and lipids | (2)               |
| 1492                 |                  |                      |                  | C and G of DNA                              | Nucleic acid                            | (4)               |

|      |      |      |                                      |                     |        |
|------|------|------|--------------------------------------|---------------------|--------|
|      | 1556 | 1550 | CC stretching Tryptophan             | Proteins            | (2)    |
|      | 1593 |      | Guanine, Adenine                     | Nucleic acid        | (1)    |
|      | 1625 |      | Amide I (C-O stretching)             | Proteins            | (5)    |
|      | 1645 |      | Amide I (alpha-helix)                | Protein,            |        |
|      | 1677 |      | NADH and Amide I (beta-sheet)        | Bound and free NADH | (2, 6) |
| 2856 |      | 2842 | CH <sub>2</sub> symmetric stretching | Lipids              | (4)    |
|      |      | 2872 | CH <sub>3</sub> symmetric stretching | Lipids              | (4)    |
| 2897 |      |      | CH stretching                        | Lipids              | (4)    |
|      | 2924 |      | CH stretching                        | Proteins            | (4)    |
|      | 2940 | 2946 | CH stretching                        | Proteins            | (4)    |

---



**Table S4.** Number of patients, measured (and analyzed) cells per patient and subtypes used to compare *in-vitro* data and *in vivo* data. Leukocyte subtype was assigned by visual inspection of nuclei morphology using Kimura staining after Raman measurement. Thus, not equal numbers of cells were measured in each subpopulation.

|                  | Sterile inflammation * |         |                            | Infected *         |         |                                       |                         |                                                      |                                          |                                                       |
|------------------|------------------------|---------|----------------------------|--------------------|---------|---------------------------------------|-------------------------|------------------------------------------------------|------------------------------------------|-------------------------------------------------------|
|                  | number of patients     | Pat. ID | Measured (analysed)# cells | Number of patients | Pat. ID | Measured (analysed)# cells            | sepsis-3 classification | Pathogen and focus                                   | Used to differentiate bacteria vs. fungi | Used to differentiate Gram-positive vs. Gram-negative |
| Neutro-<br>phils | 5                      | 1       | 14 (14)                    | 7                  | 6       | 21 (17)                               | sepsis                  | <i>S. aureus</i> / blood and abscess                 | Bacteria                                 | Gram-positive                                         |
|                  |                        |         |                            |                    | 7       | 11 (10)                               | sepsis                  | <i>E. faecium</i> + <i>E.coli</i> / blood+abdomen    | Bacteria                                 | Gram-positive                                         |
|                  |                        |         |                            |                    | 8       | 39 (36)                               | sepsis                  | CNS+ <i>Streprococcus spp</i> / abscess              | Bacteria                                 | Gram-positive                                         |
|                  |                        |         |                            |                    | 9       | 29 (28)                               | sepsis                  | <i>K. pneumonia</i> /lung                            | Bacteria                                 | Gram-negative                                         |
|                  |                        | 2       | 22 (19)                    |                    | 10      | 22 (22)                               | sepsis                  | <i>Lactobacillius spp</i> +Candida / blood+abdomen   | Fungi                                    | -                                                     |
|                  |                        | 3       | 9 (9)                      |                    |         | 37 (36)                               | sepsis                  | <i>E. faecium</i> +Candida / abdomen                 | Fungi                                    | -                                                     |
|                  |                        | 4       | 12 (11)                    |                    |         | 23 (22)                               | infection               | <i>K. oxytoca</i> / urine                            | Bacteria                                 | Gram-negative                                         |
|                  |                        | 5       | 44 (23)                    |                    |         |                                       |                         |                                                      |                                          |                                                       |
| Σ#cells          | 5                      |         | 101 (76)                   | 7                  |         | 182 (171)                             |                         |                                                      |                                          |                                                       |
| Lympho-<br>cytes | 4                      | 1       | 1 (1)                      | 6                  | 10      | 4 (4)                                 | sepsis                  | <i>Lactobacillius spp</i> +Candida / blood+abdomen   | Fungi                                    | Gram-positive                                         |
|                  |                        |         |                            |                    | 11      | 3 (2)                                 | sepsis                  | <i>E. faecium</i> + Candida / abdomen                | Fungi                                    | Gram-positive                                         |
|                  |                        |         |                            |                    | 13      | 2 (2)                                 | sepsis                  | <i>Proteus spp.</i> + <i>E. coli</i> / blood+abdomen | Bacteria                                 | Gram-negative                                         |
|                  |                        | 2       | 4 (3)                      |                    | 14      | 3 (3)                                 | sepsis                  | <i>E. coli</i> / abdomen                             | Bacteria                                 | Gram-negative                                         |
|                  |                        | 3       | 6 (6)                      |                    | 15      | 2 (2)                                 | sepsis                  | <i>E. coli</i> / urine                               | Bacteria                                 | Gram-negative                                         |
|                  |                        | 4       | 8 (8)                      |                    | 16      | 1 (1)                                 | infection               | <i>E. coli</i> / urine                               | Bacteria                                 | Gram-negative                                         |
|                  |                        | Σ#cells | 4                          |                    |         | 19 (18)                               | 6                       |                                                      | 15 (14)                                  |                                                       |
| Mono-<br>cytes   | 3                      | 1       | 3 (3)                      | 6                  | 6       | 5 (5)                                 | sepsis                  | <i>S. aureus</i> / blood+abscess                     | Bacteria                                 | Gram-positive                                         |
|                  |                        | 2       | 2 (2)                      |                    | 7       | 4 (4)                                 | sepsis                  | <i>E. faecium</i> + <i>E.coli</i> / blood+abdomen    | Bacteria                                 | Gram-positive                                         |
|                  |                        | 4       | 6 (5)                      |                    | 8       | 4 (4)                                 | sepsis                  | CNS+ <i>Streprococcus spp</i> / abscess              | Bacteria                                 | Gram-positive                                         |
|                  |                        |         |                            |                    | 12      | 2 (2)                                 | infection               | <i>K. oxytoca</i> / urine                            | Bacteria                                 | Gram-negative                                         |
|                  |                        |         |                            |                    | 10      | 4 (3)                                 | sepsis                  | <i>Lactobacillius spp</i> + Candida / blood+abdomen  | Fungi                                    | -                                                     |
|                  |                        | 11      | 1 (1)                      |                    | sepsis  | <i>E. faecium</i> + Candida / abdomen | Fungi                   | -                                                    |                                          |                                                       |
| Σ#cells          | 3                      |         | 11 (10)                    | 6                  |         | 20 (19)                               |                         |                                                      |                                          |                                                       |

\* For detailed group assignment see the original publication of the clinical trial (11), sterile inflammation refers to inflammation due to non-infectious origin (e.g. surgery),

# For cases when the whole cell scan was considered background according to the automated quality check described in subsection 4.7 (main manuscript), the scans were excluded from analysis and the actual number of analyzed cells is specified in parentensis.

**Table S5.** Number of cells measured for each treatment and from each donor. 100 spectra/cell were used for analysis. For donor 6 only neutrophils were analyzed because isolated PBMC's were not enough in number to continue the experiment.

|         | Leukocytes sub-population | Non-infected | <i>C. albicans</i> | <i>K. pneumoniae</i> | <i>S. aureus</i> |
|---------|---------------------------|--------------|--------------------|----------------------|------------------|
| Donor 1 | Neutrophils               | 10           | 10                 | 12                   | 10               |
|         | Lymphocytes               | 14           | 11                 | 10                   | 12               |
|         | Monocytes                 | 10           | 4                  | 5                    | 10               |
| Donor 2 | Neutrophils               | 13           | 10                 | 10                   | 10               |
|         | Lymphocytes               | 10           | 15                 | 11                   | 10               |
|         | Monocytes                 | 11           | 10                 | 10                   | 10               |
| Donor 3 | Neutrophils               | 10           | 11                 | 10                   | 10               |
|         | Lymphocytes               | 15           | 10                 | 10                   | 11               |
|         | Monocytes                 | 10           | 10                 | 10                   | 10               |
| Donor 4 | Neutrophils               | 10           | 11                 | 9                    | 10               |
|         | Lymphocytes               | 13           | 12                 | 12                   | 10               |
|         | Monocytes                 | 10           | 10                 | 10                   | 10               |
| Donor 5 | Neutrophils               | 11           | 13                 | 10                   | 13               |
|         | Lymphocytes               | 18           | 10                 | 11                   | 11               |
|         | Monocytes                 | 10           | 10                 | 10                   | 10               |
| Donor 6 | Neutrophils               | 10           | 10                 | 19                   | 10               |

## References

1. Neugebauer U, Clement JH, Bocklitz T, Krafft C, Popp J. Identification and differentiation of single cells from peripheral blood by Raman spectroscopic imaging. *J Biophotonics*. 2010;3(8-9):579-87.
2. Topfer N, Muller MM, Dahms M, Ramoji A, Popp J, Slevogt H, et al. Raman spectroscopy reveals LPS-induced changes of biomolecular composition in monocytic THP-1 cells in a label-free manner. *Integr Biol (Camb)*. 2019.
3. Ramoji A, Ryabchykov O, Galler K, Tannert A, Markwart R, Requardt RP, et al. Raman Spectroscopy Follows Time-Dependent Changes in T Lymphocytes Isolated from Spleen of Endotoxemic Mice. *ImmunoHorizons*. 2019;3(2):45-60.
4. Pully VV, Lenferink ATM, Otto C. Time-lapse Raman imaging of single live lymphocytes. *Journal of Raman Spectroscopy*. 2011;42(2):167-73.
5. Notingher I, Verrier S, Haque S, Polak JM, Hench LL. Spectroscopic study of human lung epithelial cells (A549) in culture: living cells versus dead cells. *Biopolymers*. 2003;72(4):230-40.
6. Chen D, Yue KT, Martin C, Rhee KW, Sloan D, Callender R. Classical Raman spectroscopic studies of NADH and NAD<sup>+</sup> bound to liver alcohol dehydrogenase by difference techniques. *Biochemistry*. 1987;26(15):4776-84.
7. V. PV, M. LAT, C. O. Time - lapse Raman imaging of single live lymphocytes. *Journal of Raman Spectroscopy*. 2011;42(2):167-73.
8. Walter A, Reinicke M, Bocklitz T, Schumacher W, Rösch P, Kothe E, et al. Raman spectroscopic detection of physiology changes in plasmid-bearing *Escherichia coli* with and without antibiotic treatment. *Analytical and Bioanalytical Chemistry*. 2011;400(9):2763-73.
9. Czamara K, Majzner K, Pacia MZ, Kochan K, Kaczor A, Baranska M. Raman spectroscopy of lipids: a review. *Journal of Raman Spectroscopy*. 2015;46(1):4-20.
10. Neault JF, Tajmir-Riahi HA. Diethylstilbestrol-DNA interaction studied by Fourier transform infrared and Raman spectroscopy. *J Biol Chem*. 1996;271(14):8140-3.
11. Ramoji A, Thomas-Rüddel D, Ryabchykov O, Bauer M, Arend N, Giamarellos-Bourboulis EJ, et al. Leukocyte Activation Profile Assessed by Raman Spectroscopy Helps Diagnosing Infection and Sepsis. *Crit Care Explor*. 2021;3(5):e0394.
